# Supplementary material for: Alteration of tumor associated neutrophils by PIK3CA expression in endometrial carcinoma from TCGA data
Source: PubMed Central journal article supplement (PMC6717327; doi:10.1186/s13048-019-0557-6), 2019-08-31

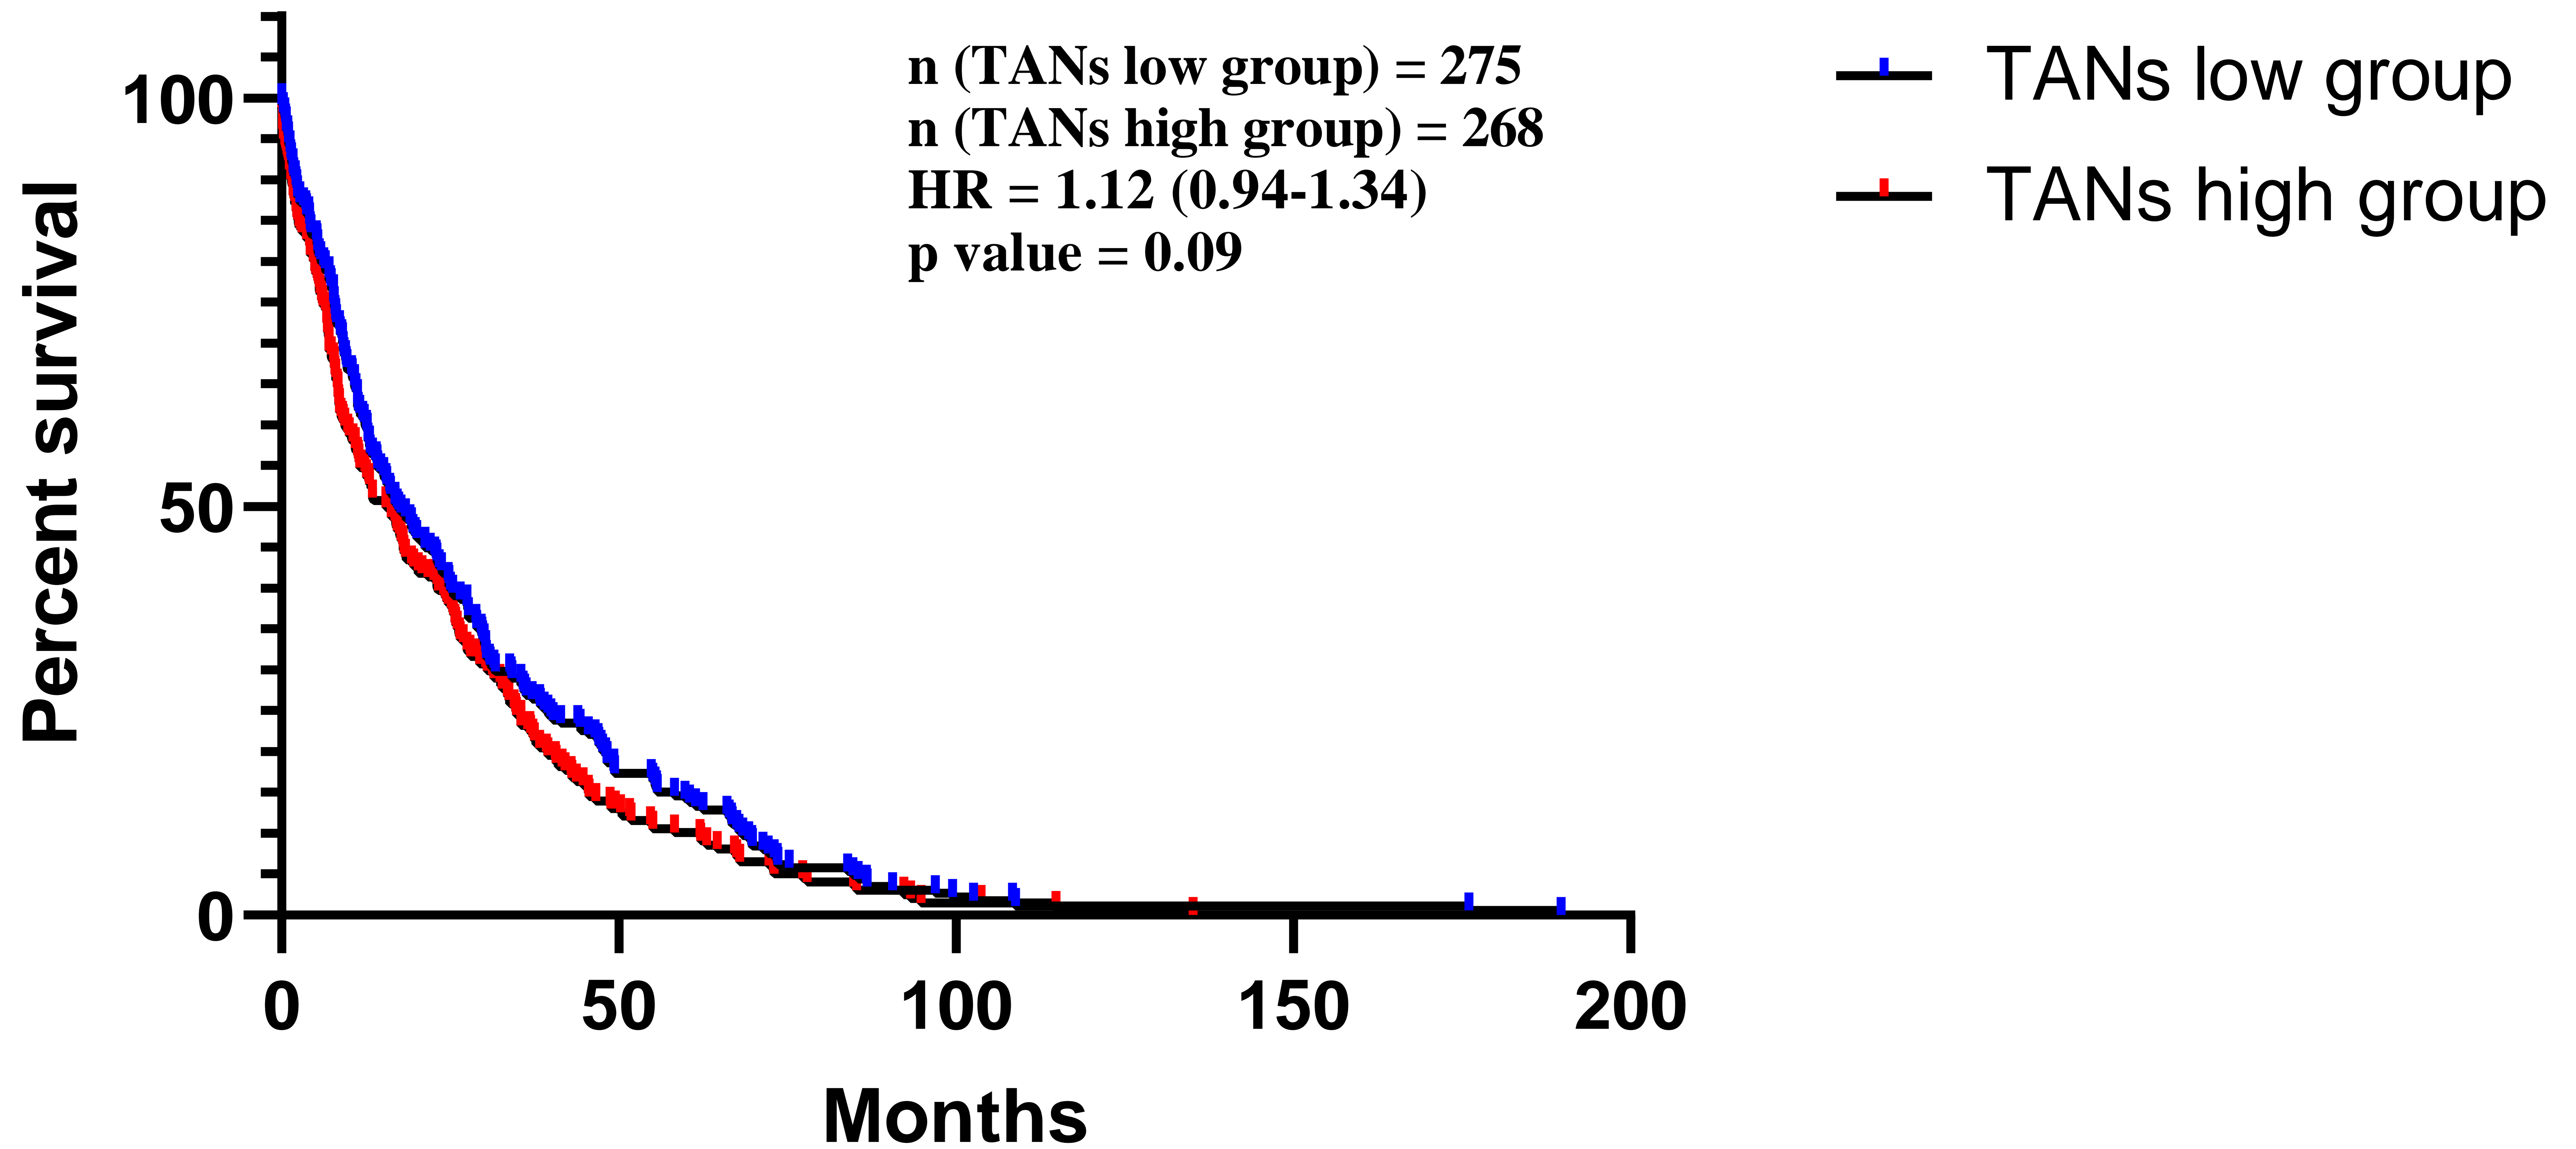

Supplement: 13048_2019_557_MOESM3_ESM.pdf [file 13048_2019_557_MOESM3_ESM.pdf]
