# Supplementary material for: Alteration of tumor associated neutrophils by PIK3CA expression in endometrial carcinoma from TCGA data
Source: Springer Nature journal article supplement (doi:10.1186/s13048-019-0557-6), 2019-08-31

a

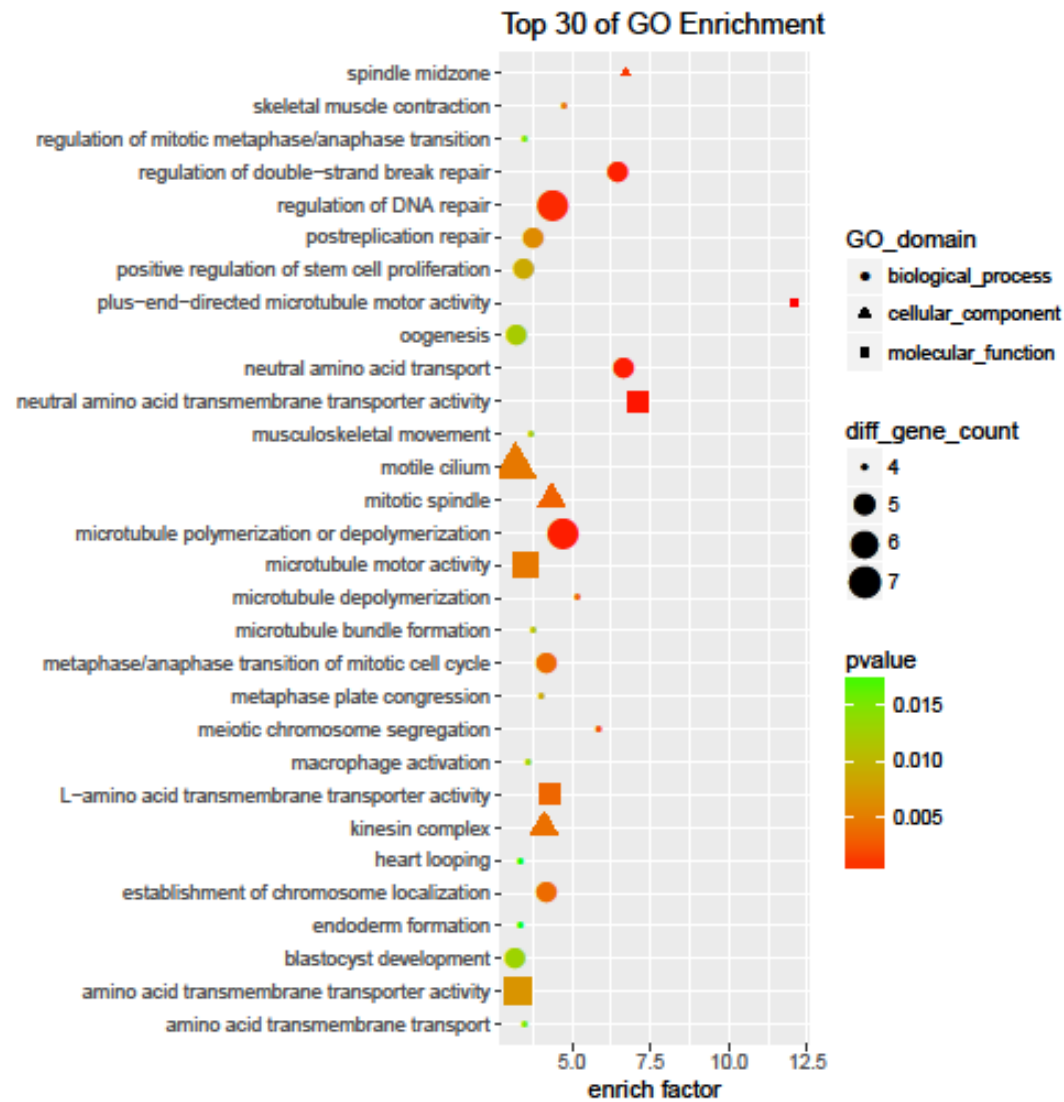

b

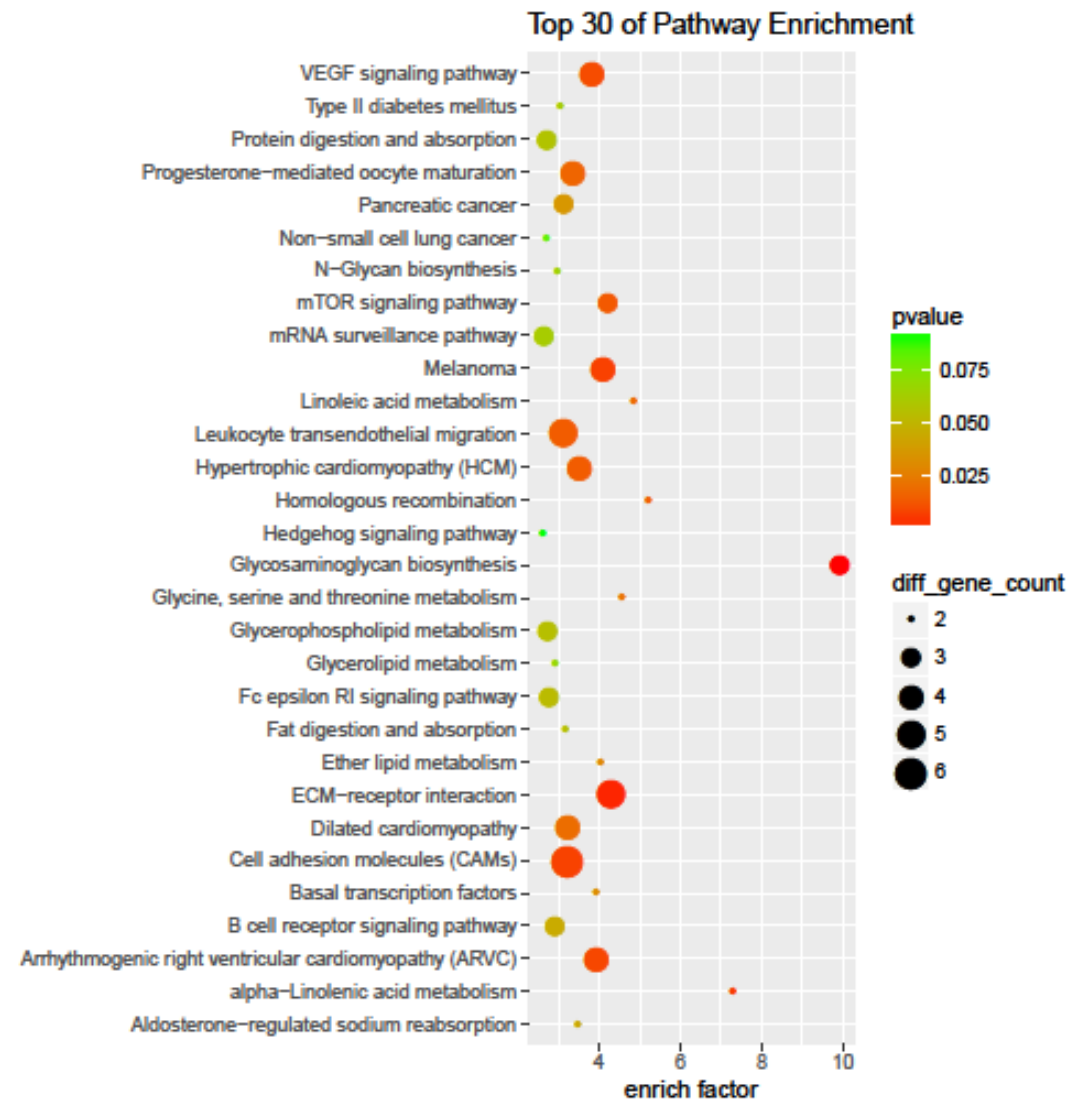

Supplement: MOESM1 [file 17125878]
